# Supplementary material
Source: PubMed Central journal article supplement (PMC4297565)

# Suppl. Fig 1. Fletcher et al

## A

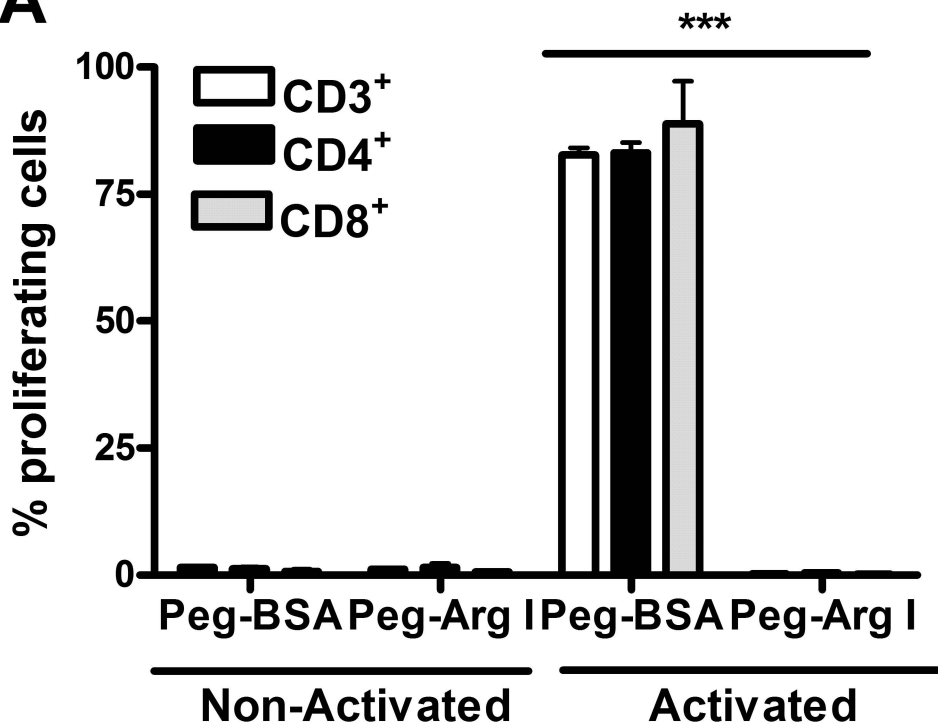

## B

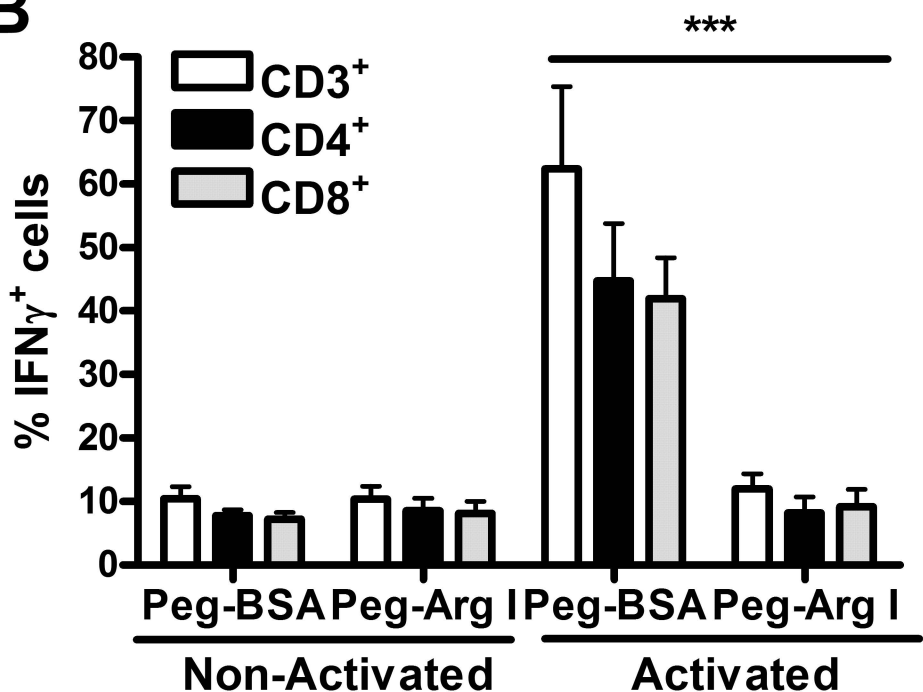

# Suppl. Fig. 2. Fletcher et al

## A

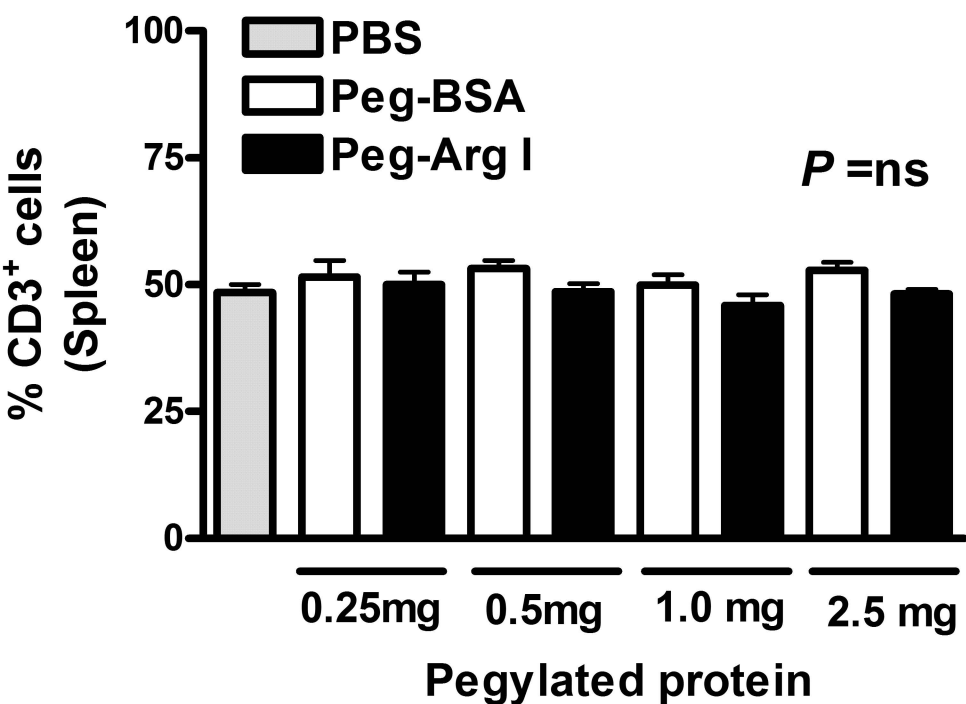

## B

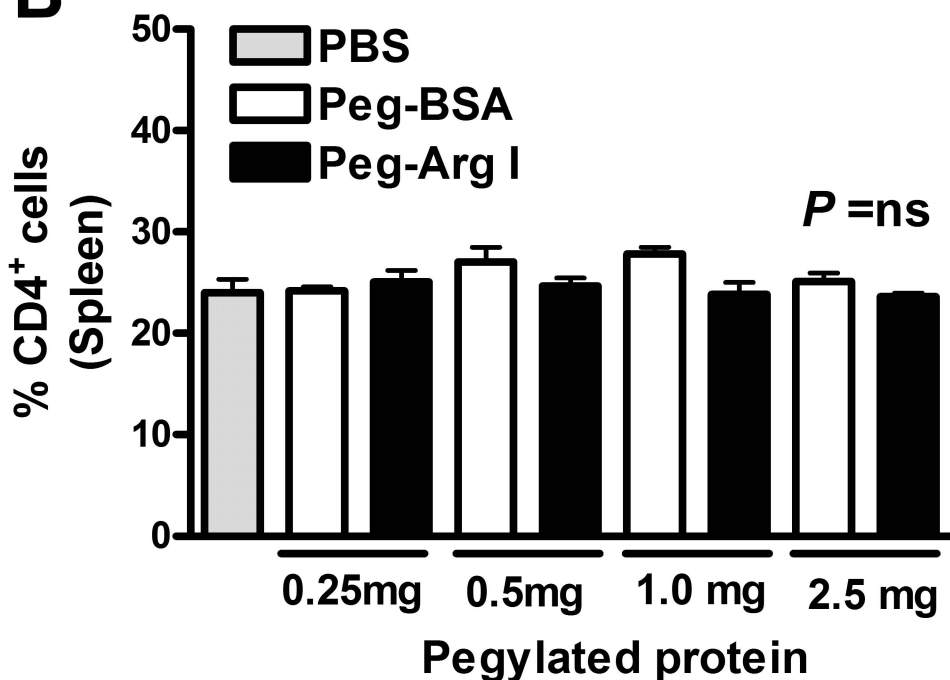

## C

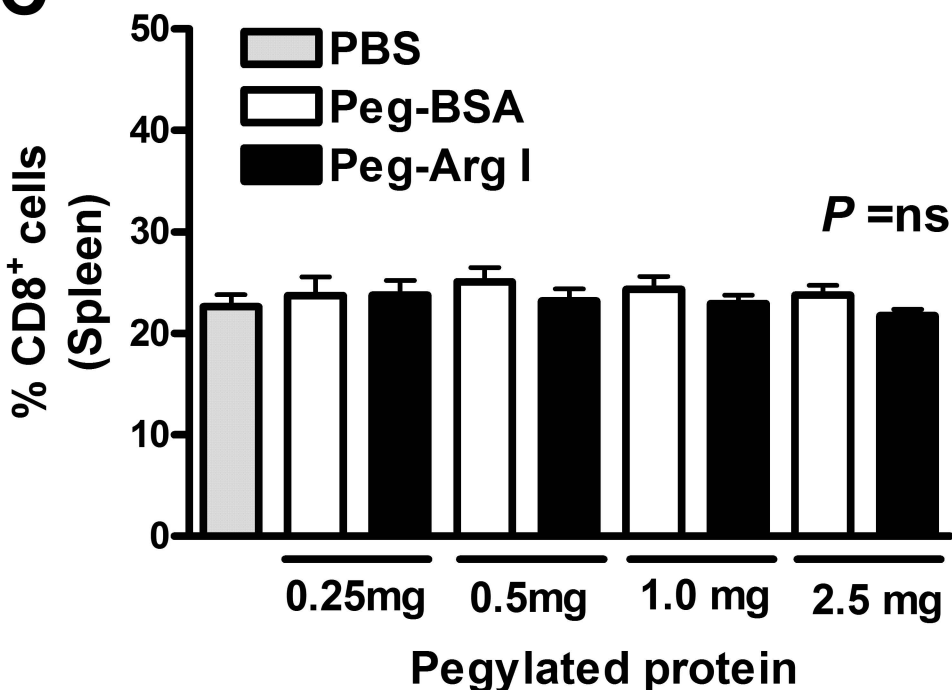

# Suppl. Figure 3. Fletcher et al.

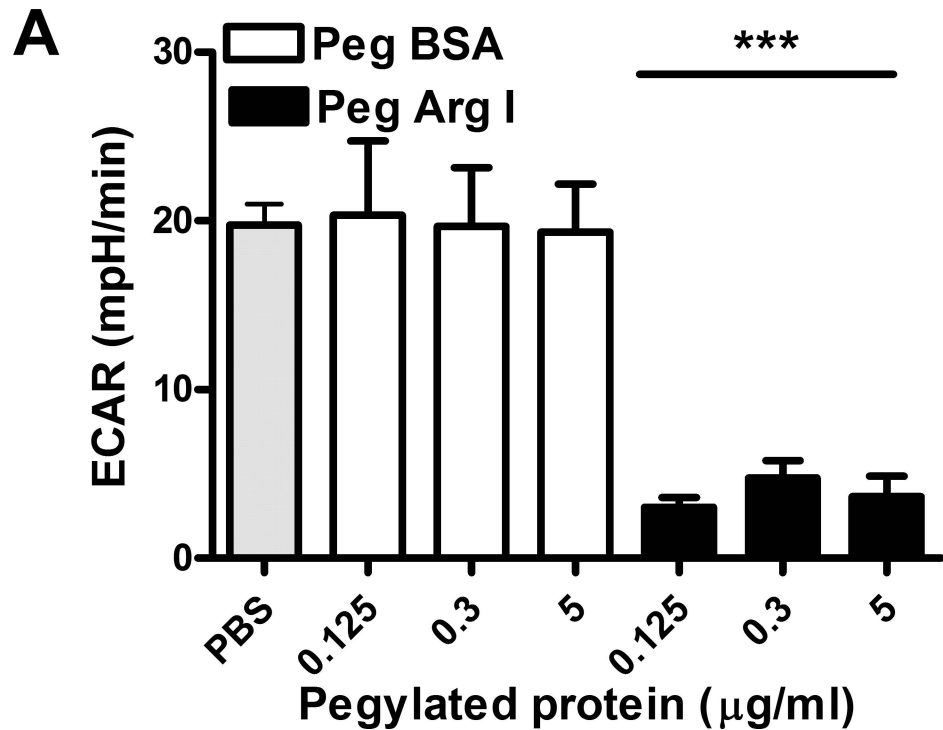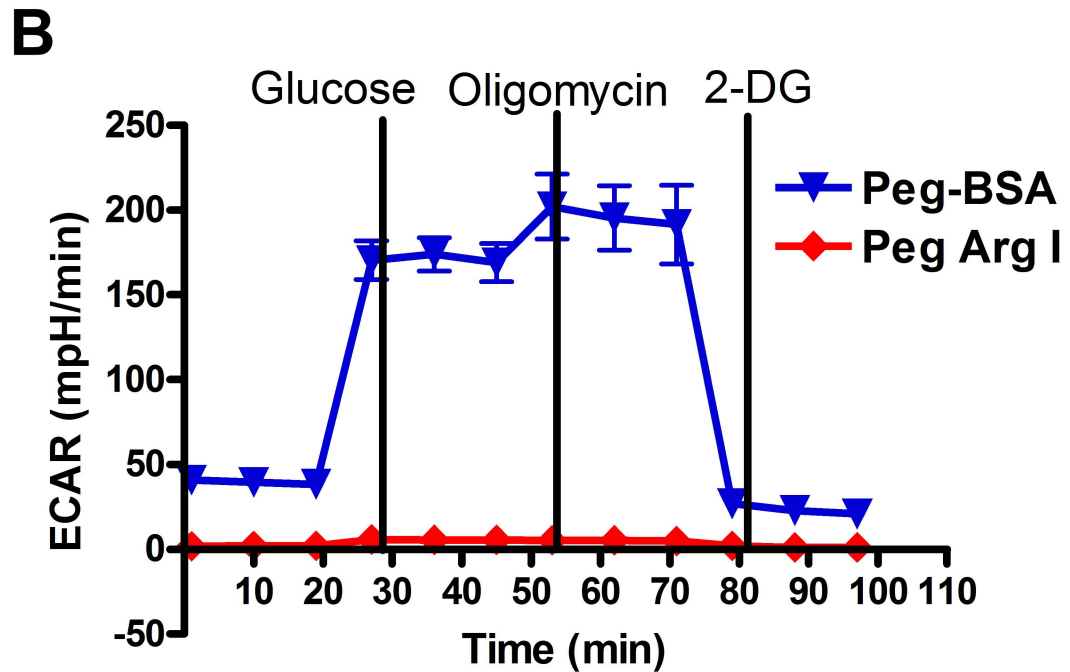

# Suppl. Figure 4. Fletcher et al.

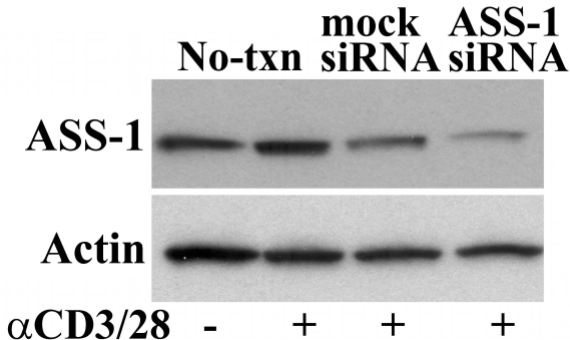

## Suppl. Figure 5. Fletcher et al.

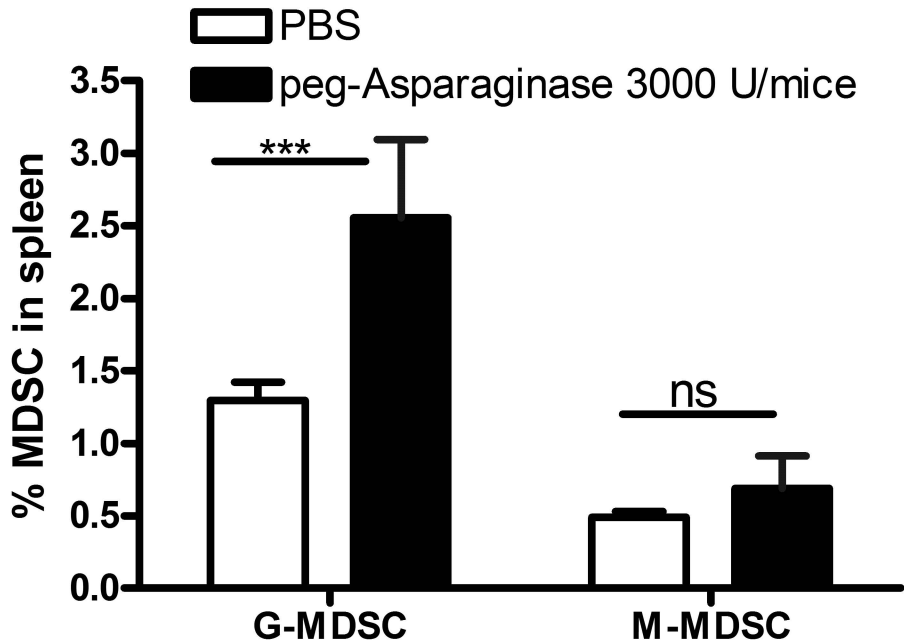

# Suppl. Figure 6. Fletcher et al

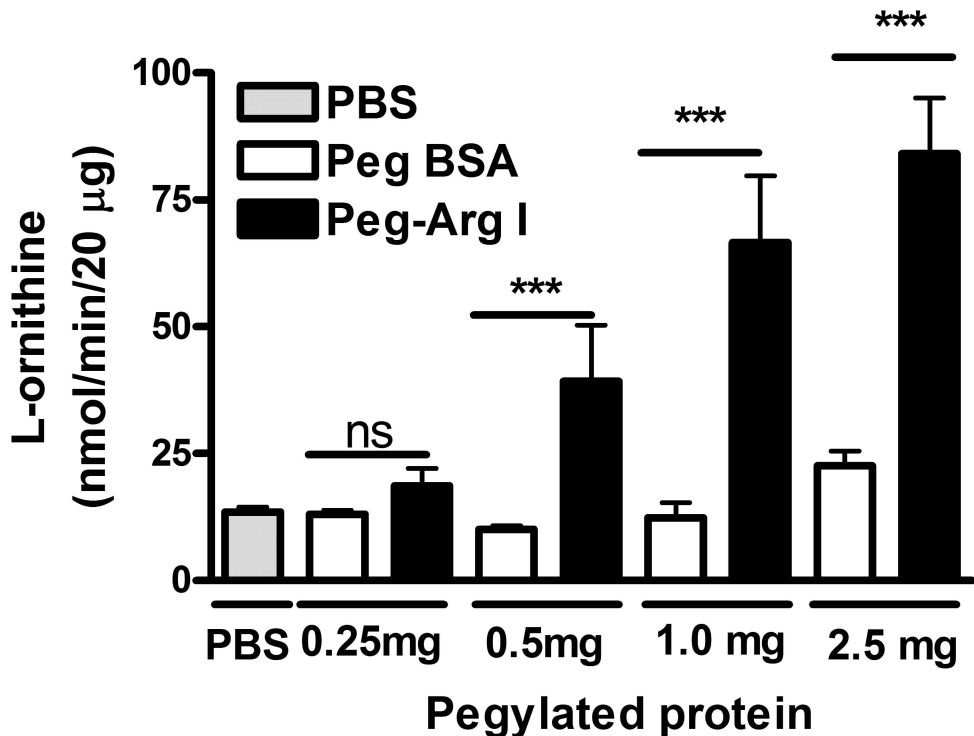

Supplement: NIHMS644449-supplement-2.pdf [file NIHMS644449-supplement-2.pdf]
